# Supplementary material for: Seroepidemiology among Employees of New York City Health and Hospitals during the First Wave of the SARS-CoV-2 Epidemic
Source: bioRxiv or medRxiv preprint supplement (doi:10.1101/2021.04.12.21255344), 2021-04-15
Supplement: Supplementary file [file media-1.pdf]

**New York City Health + Hospitals Employee COVID-19 Antibodies Survey**

|                                                                                                                                                                                                                                                                                                                      |                                                                                                                                                                                                                                                                                                                                                                                                                                                                                                                                                                           |
|----------------------------------------------------------------------------------------------------------------------------------------------------------------------------------------------------------------------------------------------------------------------------------------------------------------------|---------------------------------------------------------------------------------------------------------------------------------------------------------------------------------------------------------------------------------------------------------------------------------------------------------------------------------------------------------------------------------------------------------------------------------------------------------------------------------------------------------------------------------------------------------------------------|
| Name                                                                                                                                                                                                                                                                                                                 |                                                                                                                                                                                                                                                                                                                                                                                                                                                                                                                                                                           |
| Medical record number (if known)                                                                                                                                                                                                                                                                                     |                                                                                                                                                                                                                                                                                                                                                                                                                                                                                                                                                                           |
| <b>1. Data collection</b>                                                                                                                                                                                                                                                                                            |                                                                                                                                                                                                                                                                                                                                                                                                                                                                                                                                                                           |
| 1.1. Date of survey (DD/MM/YYYY)                                                                                                                                                                                                                                                                                     | ___/___/___                                                                                                                                                                                                                                                                                                                                                                                                                                                                                                                                                               |
| 1.2. Format of survey                                                                                                                                                                                                                                                                                                | <input type="checkbox"/> In person<br><input type="checkbox"/> Web-based<br><input type="checkbox"/> Telephone                                                                                                                                                                                                                                                                                                                                                                                                                                                            |
| 1.3. Permission to contact for future research?<br>“We are still learning about the meaning of these antibody results and we may follow participants over time to find out whether they have gotten sick or to repeat antibody testing. Is it okay if we contact you in the future to participate in another study?” | <input type="checkbox"/> Yes <input type="checkbox"/> No<br>*If no, skip to section 2                                                                                                                                                                                                                                                                                                                                                                                                                                                                                     |
| 1.4. Primary phone number                                                                                                                                                                                                                                                                                            |                                                                                                                                                                                                                                                                                                                                                                                                                                                                                                                                                                           |
| 1.5. Secondary phone number                                                                                                                                                                                                                                                                                          |                                                                                                                                                                                                                                                                                                                                                                                                                                                                                                                                                                           |
| 1.6. Email address                                                                                                                                                                                                                                                                                                   |                                                                                                                                                                                                                                                                                                                                                                                                                                                                                                                                                                           |
| <b>2. Demographic Information</b>                                                                                                                                                                                                                                                                                    |                                                                                                                                                                                                                                                                                                                                                                                                                                                                                                                                                                           |
| 2.1. Date of birth (DD/MM/YYYY)                                                                                                                                                                                                                                                                                      | ___/___/___                                                                                                                                                                                                                                                                                                                                                                                                                                                                                                                                                               |
| 2.2. Sex                                                                                                                                                                                                                                                                                                             | <input type="checkbox"/> Male <input type="checkbox"/> Female                                                                                                                                                                                                                                                                                                                                                                                                                                                                                                             |
| 2.3 Zip code of primary residence                                                                                                                                                                                                                                                                                    |                                                                                                                                                                                                                                                                                                                                                                                                                                                                                                                                                                           |
| 2.4. Country of birth                                                                                                                                                                                                                                                                                                |                                                                                                                                                                                                                                                                                                                                                                                                                                                                                                                                                                           |
| 2.5. Race                                                                                                                                                                                                                                                                                                            | <input type="checkbox"/> American Indian<br><input type="checkbox"/> Asian<br><input type="checkbox"/> Black/African American<br><input type="checkbox"/> Pacific Islander<br><input type="checkbox"/> White<br><input type="checkbox"/> Other _____                                                                                                                                                                                                                                                                                                                      |
| 2.6. Ethnicity                                                                                                                                                                                                                                                                                                       | <input type="checkbox"/> Hispanic/Latino<br><input type="checkbox"/> Not Hispanic/Latino                                                                                                                                                                                                                                                                                                                                                                                                                                                                                  |
| 2.7. Primary work location                                                                                                                                                                                                                                                                                           | <input type="checkbox"/> Bellevue Hospital<br><input type="checkbox"/> Coney Island Hospital<br><input type="checkbox"/> Elmhurst Hospital<br><input type="checkbox"/> Harlem Hospital<br><input type="checkbox"/> Jacobi Hospital<br><input type="checkbox"/> Kings County Hospital<br><input type="checkbox"/> Lincoln Hospital<br><input type="checkbox"/> Metropolitan Hospital<br><input type="checkbox"/> North Central Bronx Hospital<br><input type="checkbox"/> Queens Hospital<br><input type="checkbox"/> Woodhull Hospital<br><input type="checkbox"/> Belvis |

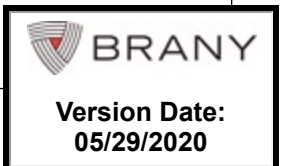

|                                                                                                               |                                                                                                                                                                                                                                                                                                                                                                                                                                                                                                                                                                                                                                                                                                                                                                                                                                                                                                                                                 |
|---------------------------------------------------------------------------------------------------------------|-------------------------------------------------------------------------------------------------------------------------------------------------------------------------------------------------------------------------------------------------------------------------------------------------------------------------------------------------------------------------------------------------------------------------------------------------------------------------------------------------------------------------------------------------------------------------------------------------------------------------------------------------------------------------------------------------------------------------------------------------------------------------------------------------------------------------------------------------------------------------------------------------------------------------------------------------|
|                                                                                                               | <input type="checkbox"/> East New York<br><input type="checkbox"/> Gouverneur<br><input type="checkbox"/> Morrisania<br><input type="checkbox"/> Sydenham<br><input type="checkbox"/> Vanderbilt<br><input type="checkbox"/> Gotham Health- Neighborhood Health Clinic<br><input type="checkbox"/> Carter<br><input type="checkbox"/> Coler<br><input type="checkbox"/> McKinney<br><input type="checkbox"/> Seaview<br><input type="checkbox"/> Home and Community Based (ie Community Care)<br><input type="checkbox"/> Central Office                                                                                                                                                                                                                                                                                                                                                                                                        |
| 2.8. Occupation in health care facility                                                                       | <input type="checkbox"/> Admission/reception clerks<br><input type="checkbox"/> Food services staff<br><input type="checkbox"/> Healthcare administrator<br><input type="checkbox"/> Lab personnel<br><input type="checkbox"/> Licensed practical nurse (or equivalent)<br><input type="checkbox"/> Maintenance/cleaning staff<br><input type="checkbox"/> Medical doctor/ nurse practitioner/ physician assistant<br><input type="checkbox"/> Nutritionist/dietitian<br><input type="checkbox"/> Patient care assistant<br><input type="checkbox"/> Patient transporter<br><input type="checkbox"/> Phlebotomist<br><input type="checkbox"/> Physical /occupational/ speech therapist<br><input type="checkbox"/> Radiology / x-ray technician<br><input type="checkbox"/> Registered nurse (or equivalent)<br><input type="checkbox"/> Respiratory therapist<br><input type="checkbox"/> Social Worker<br><input type="checkbox"/> Other_____ |
| 2.9. During the COVID pandemic, are you performing health care duties outside of your usual responsibilities? | <input type="checkbox"/> Yes <input type="checkbox"/> No                                                                                                                                                                                                                                                                                                                                                                                                                                                                                                                                                                                                                                                                                                                                                                                                                                                                                        |
| 2.10. In what setting(s) do you interact with patients?                                                       | <input type="checkbox"/> Regular patient floor<br><input type="checkbox"/> COVID patient floor<br><input type="checkbox"/> Intensive care unit<br><input type="checkbox"/> Emergency department<br><input type="checkbox"/> Outpatient Clinic<br><input type="checkbox"/> Patient homes and communities<br><input type="checkbox"/> Other_____<br><input type="checkbox"/> None                                                                                                                                                                                                                                                                                                                                                                                                                                                                                                                                                                 |

| 3. Prior COVID-19 testing/symptoms                                                                                                                                                                                                                                                                                 |                                                                                                                                                                                                                                                                                                                            |
|--------------------------------------------------------------------------------------------------------------------------------------------------------------------------------------------------------------------------------------------------------------------------------------------------------------------|----------------------------------------------------------------------------------------------------------------------------------------------------------------------------------------------------------------------------------------------------------------------------------------------------------------------------|
| 3.1. Did you receive nasal or nasopharyngeal swab testing for COVID-19 before?                                                                                                                                                                                                                                     | <input type="checkbox"/> Yes <input type="checkbox"/> No                                                                                                                                                                                                                                                                   |
| 3.2. If so, what was the result?                                                                                                                                                                                                                                                                                   | <input type="checkbox"/> Positive <input type="checkbox"/> Negative <input type="checkbox"/> N/a                                                                                                                                                                                                                           |
| 3.3 Permission to access participant records for SARS-CoV-2 PCR results?<br>“Some employees have been tested for coronavirus via nasopharyngeal swab PCR testing. Employees may or may not want to share their past test results. Do you allow us to access your COVID-test PCR results from our computer system?” | <input type="checkbox"/> Yes <input type="checkbox"/> No                                                                                                                                                                                                                                                                   |
| 3.4 Did you receive COVID-19 antibody blood testing from a program other than the Health and Hospitals employee testing program, such as through Mount Sinai, the Department of Health, the CDC, or an outside group such as CityMD? Y/N                                                                           | <input type="checkbox"/> Yes <input type="checkbox"/> No                                                                                                                                                                                                                                                                   |
| 3.5 If so, what was the result?                                                                                                                                                                                                                                                                                    | <input type="checkbox"/> Positive (you have antibodies to COVID-19)<br><input type="checkbox"/> Negative (you do not have antibodies to COVID-19)<br><input type="checkbox"/> Indeterminate (the test couldn't tell if you have antibodies or not)<br><input type="checkbox"/> I don't know (you do not know your results) |
| 3.6. Have you experienced any of the following symptoms since January 1, 2020?                                                                                                                                                                                                                                     |                                                                                                                                                                                                                                                                                                                            |
| -Fever (greater than 100 degrees Fahrenheit)                                                                                                                                                                                                                                                                       | <input type="checkbox"/> Yes <input type="checkbox"/> No                                                                                                                                                                                                                                                                   |
| -Tiredness                                                                                                                                                                                                                                                                                                         | <input type="checkbox"/> Yes <input type="checkbox"/> No                                                                                                                                                                                                                                                                   |
| -Dry cough                                                                                                                                                                                                                                                                                                         | <input type="checkbox"/> Yes <input type="checkbox"/> No                                                                                                                                                                                                                                                                   |
| -Shortness of breath                                                                                                                                                                                                                                                                                               | <input type="checkbox"/> Yes <input type="checkbox"/> No                                                                                                                                                                                                                                                                   |
| -Aches and pains                                                                                                                                                                                                                                                                                                   | <input type="checkbox"/> Yes <input type="checkbox"/> No                                                                                                                                                                                                                                                                   |
| -Sore throat                                                                                                                                                                                                                                                                                                       | <input type="checkbox"/> Yes <input type="checkbox"/> No                                                                                                                                                                                                                                                                   |
| -Runny nose                                                                                                                                                                                                                                                                                                        | <input type="checkbox"/> Yes <input type="checkbox"/> No                                                                                                                                                                                                                                                                   |
| -Diarrhea                                                                                                                                                                                                                                                                                                          | <input type="checkbox"/> Yes <input type="checkbox"/> No                                                                                                                                                                                                                                                                   |
| -Nausea                                                                                                                                                                                                                                                                                                            | <input type="checkbox"/> Yes <input type="checkbox"/> No                                                                                                                                                                                                                                                                   |
| -Decreased sense of smell or taste                                                                                                                                                                                                                                                                                 | <input type="checkbox"/> Yes <input type="checkbox"/> No                                                                                                                                                                                                                                                                   |
| 3.7. Have you missed work because of any of the above symptoms since January 1, 2020?                                                                                                                                                                                                                              | <input type="checkbox"/> Yes <input type="checkbox"/> No                                                                                                                                                                                                                                                                   |
| 4. Community exposure                                                                                                                                                                                                                                                                                              |                                                                                                                                                                                                                                                                                                                            |
| 4.1. Has anyone living in your household had symptoms suggestive of COVID-19 (see above symptom list)?                                                                                                                                                                                                             | <input type="checkbox"/> Yes <input type="checkbox"/> No                                                                                                                                                                                                                                                                   |
| 4.2. Has anyone living in your household had a positive test for COVID-19?                                                                                                                                                                                                                                         | <input type="checkbox"/> Yes <input type="checkbox"/> No                                                                                                                                                                                                                                                                   |
|                                                                                                                                                                                                                                                                                                                    |                                                                                                                                                                                                                                                                                                                            |
| 5. Infection prevention and control measures                                                                                                                                                                                                                                                                       |                                                                                                                                                                                                                                                                                                                            |

|                                                                                                                                                                         |                                                                                                                                                                                                                                       |                                                                                                                                                                                                                                       |
|-------------------------------------------------------------------------------------------------------------------------------------------------------------------------|---------------------------------------------------------------------------------------------------------------------------------------------------------------------------------------------------------------------------------------|---------------------------------------------------------------------------------------------------------------------------------------------------------------------------------------------------------------------------------------|
| 5.1. When was your most recent infection prevention and control (IPC) training within the health care facility?                                                         | <input type="checkbox"/> Within the last year<br><input type="checkbox"/> Greater than one year ago<br><input type="checkbox"/> Never<br><input type="checkbox"/> I don't remember                                                    |                                                                                                                                                                                                                                       |
| 5.2. How much cumulative IPC training (standard precautions, additional precautions, donning/doffing personal protective equipment) have you had since January 1, 2020? | <input type="checkbox"/> None<br><input type="checkbox"/> Less than 1 hour<br><input type="checkbox"/> More than 1 hour                                                                                                               |                                                                                                                                                                                                                                       |
| 5.3. Do you follow recommended hand hygiene practices?                                                                                                                  | <input type="checkbox"/> Always<br><input type="checkbox"/> Most of the time<br><input type="checkbox"/> Occasionally<br><input type="checkbox"/> Rarely                                                                              |                                                                                                                                                                                                                                       |
| 5.4.                                                                                                                                                                    | <b>Do you this use PPE when indicated?</b>                                                                                                                                                                                            | <b>Is this PPE available in sufficient quantity in the health care facility?</b>                                                                                                                                                      |
| <b>Medical/surgical mask</b>                                                                                                                                            | <input type="checkbox"/> Always<br><input type="checkbox"/> Most of the time<br><input type="checkbox"/> Occasionally<br><input type="checkbox"/> Rarely<br><input type="checkbox"/> Never<br><input type="checkbox"/> Not applicable | <input type="checkbox"/> Always<br><input type="checkbox"/> Most of the time<br><input type="checkbox"/> Occasionally<br><input type="checkbox"/> Rarely<br><input type="checkbox"/> Never<br><input type="checkbox"/> Not applicable |
| <b>Respirator mask (N95 or equivalent)</b>                                                                                                                              | <input type="checkbox"/> Always<br><input type="checkbox"/> Most of the time<br><input type="checkbox"/> Occasionally<br><input type="checkbox"/> Rarely<br><input type="checkbox"/> Never<br><input type="checkbox"/> Not applicable | <input type="checkbox"/> Always<br><input type="checkbox"/> Most of the time<br><input type="checkbox"/> Occasionally<br><input type="checkbox"/> Rarely<br><input type="checkbox"/> Never<br><input type="checkbox"/> Not applicable |
| <b>Goggles/glasses</b>                                                                                                                                                  | <input type="checkbox"/> Always<br><input type="checkbox"/> Most of the time<br><input type="checkbox"/> Occasionally<br><input type="checkbox"/> Rarely<br><input type="checkbox"/> Never<br><input type="checkbox"/> Not applicable | <input type="checkbox"/> Always<br><input type="checkbox"/> Most of the time<br><input type="checkbox"/> Occasionally<br><input type="checkbox"/> Rarely<br><input type="checkbox"/> Never<br><input type="checkbox"/> Not applicable |
| <b>Face shield</b>                                                                                                                                                      | <input type="checkbox"/> Always<br><input type="checkbox"/> Most of the time<br><input type="checkbox"/> Occasionally<br><input type="checkbox"/> Rarely<br><input type="checkbox"/> Never<br><input type="checkbox"/> Not applicable | <input type="checkbox"/> Always<br><input type="checkbox"/> Most of the time<br><input type="checkbox"/> Occasionally<br><input type="checkbox"/> Rarely<br><input type="checkbox"/> Never<br><input type="checkbox"/> Not applicable |
| <b>Gloves</b>                                                                                                                                                           | <input type="checkbox"/> Always<br><input type="checkbox"/> Most of the time<br><input type="checkbox"/> Occasionally                                                                                                                 | <input type="checkbox"/> Always<br><input type="checkbox"/> Most of the time<br><input type="checkbox"/> Occasionally                                                                                                                 |

|                                                                  |                                                                                                                                                                                                                                       |                                                                                                                                                                                                                                       |
|------------------------------------------------------------------|---------------------------------------------------------------------------------------------------------------------------------------------------------------------------------------------------------------------------------------|---------------------------------------------------------------------------------------------------------------------------------------------------------------------------------------------------------------------------------------|
|                                                                  | <input type="checkbox"/> Rarely<br><input type="checkbox"/> Never<br><input type="checkbox"/> Not applicable                                                                                                                          | <input type="checkbox"/> Rarely<br><input type="checkbox"/> Never<br><input type="checkbox"/> Not applicable                                                                                                                          |
| <b>Contact gown</b>                                              | <input type="checkbox"/> Always<br><input type="checkbox"/> Most of the time<br><input type="checkbox"/> Occasionally<br><input type="checkbox"/> Rarely<br><input type="checkbox"/> Never<br><input type="checkbox"/> Not applicable | <input type="checkbox"/> Always<br><input type="checkbox"/> Most of the time<br><input type="checkbox"/> Occasionally<br><input type="checkbox"/> Rarely<br><input type="checkbox"/> Never<br><input type="checkbox"/> Not applicable |
| <b>Impermeable gown</b>                                          | <input type="checkbox"/> Always<br><input type="checkbox"/> Most of the time<br><input type="checkbox"/> Occasionally<br><input type="checkbox"/> Rarely<br><input type="checkbox"/> Never<br><input type="checkbox"/> Not applicable | <input type="checkbox"/> Always<br><input type="checkbox"/> Most of the time<br><input type="checkbox"/> Occasionally<br><input type="checkbox"/> Rarely<br><input type="checkbox"/> Never<br><input type="checkbox"/> Not applicable |
| <b>Coverall/bodysuit</b>                                         | <input type="checkbox"/> Always<br><input type="checkbox"/> Most of the time<br><input type="checkbox"/> Occasionally<br><input type="checkbox"/> Rarely<br><input type="checkbox"/> Never<br><input type="checkbox"/> Not applicable | <input type="checkbox"/> Always<br><input type="checkbox"/> Most of the time<br><input type="checkbox"/> Occasionally<br><input type="checkbox"/> Rarely<br><input type="checkbox"/> Never<br><input type="checkbox"/> Not applicable |
| <b>Head cover</b>                                                | <input type="checkbox"/> Always<br><input type="checkbox"/> Most of the time<br><input type="checkbox"/> Occasionally<br><input type="checkbox"/> Rarely<br><input type="checkbox"/> Never<br><input type="checkbox"/> Not applicable | <input type="checkbox"/> Always<br><input type="checkbox"/> Most of the time<br><input type="checkbox"/> Occasionally<br><input type="checkbox"/> Rarely<br><input type="checkbox"/> Never<br><input type="checkbox"/> Not applicable |
| <b>Shoe covers</b>                                               | <input type="checkbox"/> Always<br><input type="checkbox"/> Most of the time<br><input type="checkbox"/> Occasionally<br><input type="checkbox"/> Rarely<br><input type="checkbox"/> Never<br><input type="checkbox"/> Not applicable | <input type="checkbox"/> Always<br><input type="checkbox"/> Most of the time<br><input type="checkbox"/> Occasionally<br><input type="checkbox"/> Rarely<br><input type="checkbox"/> Never<br><input type="checkbox"/> Not applicable |
| <b>HEPA filter (on endotracheal tube for intubated patients)</b> | <input type="checkbox"/> Always<br><input type="checkbox"/> Most of the time<br><input type="checkbox"/> Occasionally<br><input type="checkbox"/> Rarely<br><input type="checkbox"/> Never<br><input type="checkbox"/> Not applicable | <input type="checkbox"/> Always<br><input type="checkbox"/> Most of the time<br><input type="checkbox"/> Occasionally<br><input type="checkbox"/> Rarely<br><input type="checkbox"/> Never<br><input type="checkbox"/> Not applicable |

**6. Exposures to COVID-19 infected patients**

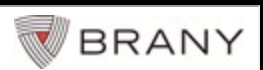

**Version Date:**  
**05/29/2020**

|                                                                                                                                                                                                                                                               |                                                                                                                                                                                                                                                                                                                                                                                                                                                                             |
|---------------------------------------------------------------------------------------------------------------------------------------------------------------------------------------------------------------------------------------------------------------|-----------------------------------------------------------------------------------------------------------------------------------------------------------------------------------------------------------------------------------------------------------------------------------------------------------------------------------------------------------------------------------------------------------------------------------------------------------------------------|
| 6.1. Have you had close contact (within 6 feet/2 meters) with at least one COVID-19 positive patient since his/her admission?                                                                                                                                 | <input type="checkbox"/> Yes <input type="checkbox"/> No <input type="checkbox"/> Unknown<br>*If no, skip to section 7                                                                                                                                                                                                                                                                                                                                                      |
| 6.2. If yes, for approximately how many encounters (total)?                                                                                                                                                                                                   | <input type="checkbox"/> 1 to 9<br><input type="checkbox"/> 10 to 19<br><input type="checkbox"/> 20 to 29<br><input type="checkbox"/> 30 to 39<br><input type="checkbox"/> 40 to 59<br><input type="checkbox"/> 50 or more                                                                                                                                                                                                                                                  |
| 6.3. For how long each time?                                                                                                                                                                                                                                  | <input type="checkbox"/> <5 minutes<br><input type="checkbox"/> 5-15 minutes<br><input type="checkbox"/> >15 minutes                                                                                                                                                                                                                                                                                                                                                        |
| 6.4. Did you wear a respirator mask (N95 or equivalent)?                                                                                                                                                                                                      | <input type="checkbox"/> Always<br><input type="checkbox"/> Most of the time<br><input type="checkbox"/> Occasionally<br><input type="checkbox"/> Rarely<br><input type="checkbox"/> Never                                                                                                                                                                                                                                                                                  |
| 6.5. If you were wearing a respirator, was it fit tested?                                                                                                                                                                                                     | <input type="checkbox"/> Yes <input type="checkbox"/> No <input type="checkbox"/> Unknown                                                                                                                                                                                                                                                                                                                                                                                   |
| 6.6. Have you needed to re-use a respirator mask (N95 or equivalent) for more than one day of patient care?                                                                                                                                                   | <input type="checkbox"/> Yes <input type="checkbox"/> No <input type="checkbox"/> N/a                                                                                                                                                                                                                                                                                                                                                                                       |
| 6.7. If yes, for how many days do you use each mask on average?                                                                                                                                                                                               | _____ days                                                                                                                                                                                                                                                                                                                                                                                                                                                                  |
| <b>7. Exposures to COVID-19 infected patient materials</b>                                                                                                                                                                                                    |                                                                                                                                                                                                                                                                                                                                                                                                                                                                             |
| 7.1. Have you had direct contact with a COVID-19 infected patient's materials since his/her admission? <sup>SEP</sup> <i>(Patient's materials: personal belongings, linens, medical equipment, surfaces, etc. that the patient may have had contact with)</i> | <input type="checkbox"/> Yes <input type="checkbox"/> No <input type="checkbox"/> Unknown<br>*If no, skip to section 8                                                                                                                                                                                                                                                                                                                                                      |
| 7.2. If yes, which materials?                                                                                                                                                                                                                                 | Check all that apply:<br><input type="checkbox"/> Clothes<br><input type="checkbox"/> Personal items<br><input type="checkbox"/> Linens<br><input type="checkbox"/> Medical devices used on the patient<br><input type="checkbox"/> Medical equipment connected to the patient (e.g. ventilator, infusion pump etc)<br><input type="checkbox"/> Bed<br><input type="checkbox"/> Bathroom<br><input type="checkbox"/> Bedside table<br><input type="checkbox"/> Other: _____ |
| 7.3. Approximately how many times (total)?                                                                                                                                                                                                                    | <input type="checkbox"/> None                                                                                                                                                                                                                                                                                                                                                                                                                                               |

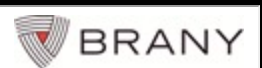

|  |                                                                                                                                       |
|--|---------------------------------------------------------------------------------------------------------------------------------------|
|  | <input type="checkbox"/> 1-4<br><input type="checkbox"/> 5-9<br><input type="checkbox"/> 10-19<br><input type="checkbox"/> 20 or more |
|--|---------------------------------------------------------------------------------------------------------------------------------------|

**8. Exposures to aerosolizing procedures**

|                   | <b>How many times have you been involved in the following procedures (in the patient room/at bedside)?</b>                                                             | <b>What proportion of the time were you wearing appropriate PPE?</b>                                                                                                                                                                                                                                                                                                                                                                                                                                                                                                                                                                                                                                                      |
|-------------------|------------------------------------------------------------------------------------------------------------------------------------------------------------------------|---------------------------------------------------------------------------------------------------------------------------------------------------------------------------------------------------------------------------------------------------------------------------------------------------------------------------------------------------------------------------------------------------------------------------------------------------------------------------------------------------------------------------------------------------------------------------------------------------------------------------------------------------------------------------------------------------------------------------|
| <b>Intubation</b> | <input type="checkbox"/> None<br><input type="checkbox"/> 1-4<br><input type="checkbox"/> 5-9<br><input type="checkbox"/> 10-19<br><input type="checkbox"/> 20 or more | <input type="checkbox"/> Always<br><input type="checkbox"/> Most of the time<br><input type="checkbox"/> Occasionally<br><input type="checkbox"/> Rarely<br><input type="checkbox"/> Never<br><input type="checkbox"/> Not applicable<br><br>What type? (Check all that apply):<br><input type="checkbox"/> Medical mask<br><input type="checkbox"/> Face shield<br><input type="checkbox"/> Gloves<br><input type="checkbox"/> Goggles/glasses<br><input type="checkbox"/> Contact gown<br><input type="checkbox"/> Impermeable gown<br><input type="checkbox"/> Coverall<br><input type="checkbox"/> Head cover<br><input type="checkbox"/> Respirator (e.g. N95 or equivalent)<br><input type="checkbox"/> Shoe covers |
| <b>Extubation</b> | <input type="checkbox"/> None<br><input type="checkbox"/> 1-4<br><input type="checkbox"/> 5-9<br><input type="checkbox"/> 10-19<br><input type="checkbox"/> 20 or more | <input type="checkbox"/> Always<br><input type="checkbox"/> Most of the time<br><input type="checkbox"/> Occasionally<br><input type="checkbox"/> Rarely<br><input type="checkbox"/> Never<br><input type="checkbox"/> Not applicable<br><br>What type? (Check all that apply):<br><input type="checkbox"/> Medical mask<br><input type="checkbox"/> Face shield<br><input type="checkbox"/> Gloves<br><input type="checkbox"/> Goggles/glasses<br><input type="checkbox"/> Contact gown<br><input type="checkbox"/> Impermeable gown<br><input type="checkbox"/> Coverall<br><input type="checkbox"/> Head cover<br><input type="checkbox"/> Respirator (e.g. N95 or equivalent)<br><input type="checkbox"/> Shoe covers |

|  |                                                                          |                                                                      |
|--|--------------------------------------------------------------------------|----------------------------------------------------------------------|
|  | <b>How many times have you been involved in the following procedures</b> | <b>What proportion of the time were you wearing appropriate PPE?</b> |
|--|--------------------------------------------------------------------------|----------------------------------------------------------------------|



**BRANY**  
 Version Date:  
 05/29/2020

|                        | (in the patient room/at bedside)?                                                                                                                                      |                                                                                                                                                                                                                                                                                                                                                                                                                                                                                                                                                                                                                                                                                                                           |
|------------------------|------------------------------------------------------------------------------------------------------------------------------------------------------------------------|---------------------------------------------------------------------------------------------------------------------------------------------------------------------------------------------------------------------------------------------------------------------------------------------------------------------------------------------------------------------------------------------------------------------------------------------------------------------------------------------------------------------------------------------------------------------------------------------------------------------------------------------------------------------------------------------------------------------------|
| <b>Bronchoscopy</b>    | <input type="checkbox"/> None<br><input type="checkbox"/> 1-4<br><input type="checkbox"/> 5-9<br><input type="checkbox"/> 10-19<br><input type="checkbox"/> 20 or more | <input type="checkbox"/> Always<br><input type="checkbox"/> Most of the time<br><input type="checkbox"/> Occasionally<br><input type="checkbox"/> Rarely<br><input type="checkbox"/> Never<br><input type="checkbox"/> Not applicable<br><br>What type? (Check all that apply):<br><input type="checkbox"/> Medical mask<br><input type="checkbox"/> Face shield<br><input type="checkbox"/> Gloves<br><input type="checkbox"/> Goggles/glasses<br><input type="checkbox"/> Contact gown<br><input type="checkbox"/> Impermeable gown<br><input type="checkbox"/> Coverall<br><input type="checkbox"/> Head cover<br><input type="checkbox"/> Respirator (e.g. N95 or equivalent)<br><input type="checkbox"/> Shoe covers |
| <b>Open suctioning</b> | <input type="checkbox"/> None<br><input type="checkbox"/> 1-4<br><input type="checkbox"/> 5-9<br><input type="checkbox"/> 10-19<br><input type="checkbox"/> 20 or more | <input type="checkbox"/> Always<br><input type="checkbox"/> Most of the time<br><input type="checkbox"/> Occasionally<br><input type="checkbox"/> Rarely<br><input type="checkbox"/> Never<br><input type="checkbox"/> Not applicable<br><br>What type? (Check all that apply):<br><input type="checkbox"/> Medical mask<br><input type="checkbox"/> Face shield<br><input type="checkbox"/> Gloves<br><input type="checkbox"/> Goggles/glasses<br><input type="checkbox"/> Contact gown<br><input type="checkbox"/> Impermeable gown<br><input type="checkbox"/> Coverall<br><input type="checkbox"/> Head cover<br><input type="checkbox"/> Respirator (e.g. N95 or equivalent)<br><input type="checkbox"/> Shoe covers |
|                        | <b>How many times have you been involved in the following procedures</b>                                                                                               | <b>What proportion of the time were you wearing appropriate PPE</b>                                                                                                                                                                                                                                                                                                                                                                                                                                                                                                                                                                                                                                                       |



|                                                                                        | <b>(in the patient room/at bedside)?</b>                                                                                                                               |                                                                                                                                                                                                                                                                                                                                                                                                                                                                                                                                                                                                                                                                                                                           |
|----------------------------------------------------------------------------------------|------------------------------------------------------------------------------------------------------------------------------------------------------------------------|---------------------------------------------------------------------------------------------------------------------------------------------------------------------------------------------------------------------------------------------------------------------------------------------------------------------------------------------------------------------------------------------------------------------------------------------------------------------------------------------------------------------------------------------------------------------------------------------------------------------------------------------------------------------------------------------------------------------------|
| <b>Administration of nebulized medication</b>                                          | <input type="checkbox"/> None<br><input type="checkbox"/> 1-4<br><input type="checkbox"/> 5-9<br><input type="checkbox"/> 10-19<br><input type="checkbox"/> 20 or more | <input type="checkbox"/> Always<br><input type="checkbox"/> Most of the time<br><input type="checkbox"/> Occasionally<br><input type="checkbox"/> Rarely<br><input type="checkbox"/> Never<br><input type="checkbox"/> Not applicable<br><br>What type? (Check all that apply):<br><input type="checkbox"/> Medical mask<br><input type="checkbox"/> Face shield<br><input type="checkbox"/> Gloves<br><input type="checkbox"/> Goggles/glasses<br><input type="checkbox"/> Contact gown<br><input type="checkbox"/> Impermeable gown<br><input type="checkbox"/> Coverall<br><input type="checkbox"/> Head cover<br><input type="checkbox"/> Respirator (e.g. N95 or equivalent)<br><input type="checkbox"/> Shoe covers |
| <b>Non-invasive positive pressure ventilation (CPAP/BIPAP/high flow nasal cannula)</b> | <input type="checkbox"/> None<br><input type="checkbox"/> 1-4<br><input type="checkbox"/> 5-9<br><input type="checkbox"/> 10-19<br><input type="checkbox"/> 20 or more | <input type="checkbox"/> Always<br><input type="checkbox"/> Most of the time<br><input type="checkbox"/> Occasionally<br><input type="checkbox"/> Rarely<br><input type="checkbox"/> Never<br><input type="checkbox"/> Not applicable<br><br>What type? (Check all that apply):<br><input type="checkbox"/> Medical mask<br><input type="checkbox"/> Face shield<br><input type="checkbox"/> Gloves<br><input type="checkbox"/> Goggles/glasses<br><input type="checkbox"/> Contact gown<br><input type="checkbox"/> Impermeable gown<br><input type="checkbox"/> Coverall<br><input type="checkbox"/> Head cover<br><input type="checkbox"/> Respirator (e.g. N95 or equivalent)<br><input type="checkbox"/> Shoe covers |
|                                                                                        | <b>How many times have you been</b>                                                                                                                                    | <b>What proportion of the</b>                                                                                                                                                                                                                                                                                                                                                                                                                                                                                                                                                                                                                                                                                             |

|                                          | <b>involved in the following procedures<br/>(in the patient room/at bedside)?</b>                                                                                      | <b>wearing appropriate PPE?</b>                                                                                                                                                                                                                                                                                                                                                                                                                                                                                                                                                                                                                                                                                           |
|------------------------------------------|------------------------------------------------------------------------------------------------------------------------------------------------------------------------|---------------------------------------------------------------------------------------------------------------------------------------------------------------------------------------------------------------------------------------------------------------------------------------------------------------------------------------------------------------------------------------------------------------------------------------------------------------------------------------------------------------------------------------------------------------------------------------------------------------------------------------------------------------------------------------------------------------------------|
| <b>CPR involving chest compressions?</b> | <input type="checkbox"/> None<br><input type="checkbox"/> 1-4<br><input type="checkbox"/> 5-9<br><input type="checkbox"/> 10-19<br><input type="checkbox"/> 20 or more | <input type="checkbox"/> Always<br><input type="checkbox"/> Most of the time<br><input type="checkbox"/> Occasionally<br><input type="checkbox"/> Rarely<br><input type="checkbox"/> Never<br><input type="checkbox"/> Not applicable<br><br>What type? (Check all that apply):<br><input type="checkbox"/> Medical mask<br><input type="checkbox"/> Face shield<br><input type="checkbox"/> Gloves<br><input type="checkbox"/> Goggles/glasses<br><input type="checkbox"/> Contact gown<br><input type="checkbox"/> Impermeable gown<br><input type="checkbox"/> Coverall<br><input type="checkbox"/> Head cover<br><input type="checkbox"/> Respirator (e.g. N95 or equivalent)<br><input type="checkbox"/> Shoe covers |

Do you have any suggestions for the health system to improve preparedness and promote the safety of healthcare workers?

---



---



---



---



---



---
