# Supplementary material for: Seroepidemiology among Employees of New York City Health and Hospitals during the First Wave of the SARS-CoV-2 Epidemic
Source: medRxiv preprint, doi:10.1101/2021.04.12.21255344, version 1 (2021-04-15)
Supplement: Supplementary Tables and Figures [file 255344_file06.docx]

**Supplements**

**eTable 1.** Exploratory Post-Hoc Analyses of Age group by SARS CoV-2 antibody status

**eTable 2.** Distribution of Positive SARS-CoV-2 Cases by Borough

**eFigure1.** Demographic characteristics of the study sample, H+H employee sample, and H+H workforce

**eFigure2.** Percent seropositivity by demographic characteristics of the study sample, H+H employee sample, and H+H workforce

**eTable 1. Exploratory Post-Hoc Analyses of Age group by SARS CoV-2 antibody status**

| **Age Group** | **Negative for SARS-CoV-2 IgG (n=513)** | **Positive for SARS-CoV-2 IgG (n=214)** | **Significance** | **Overall Sig** |
| --- | --- | --- | --- | --- |
|  |  |  |  | 0.38 |
| 21-34 | 126 (25%) | 42 (20%) | Ref |  |
| 35-44 | 117 (23%) | 56 (26%) | 0.15 |  |
| 45-54 | 118 (23%) | 56 (26%) | 0.15 |  |
| 55+ | 150 (30%) | 59 (28%) | 0.56 |  |

**eTable 2. Distribution of Positive SARS-CoV-2 Cases by Borough**

| **Borough** | **Study Distribution of Positive Antibody Tests (NYC residents only, n=166)a** | **City Distribution of Cumulative COVID Cases from 2/29/20-6/30/20b** | **Cumulative COVID Cases in NYC from 2/29/20-6/30/20b** |
| --- | --- | --- | --- |
| Queens | 34% | 30% | 74,542 |
| Brooklyn | 25% | 28% | 67,804 |
| Bronx | 20% | 22% | 53,842 |
| Manhattan | 18% | 13% | 31,204 |
| Staten Island | 3% | 7% | 17,014 |
| Overall | 100% | 100% | 244,415 |

aPercentages are column percentages.

bData retrieved from the New York City Department of Health and Mental Hygiene’s publicly available GitHub website: <https://github.com/nychealth/coronavirus-data>

**eFigure1. Demographic characteristics of the study sample, H+H employee sample, and H+H workforce.**

A: Distribution of sex by study sample, H+H employee sample, and H+H workforce

B: Distribution of race/ethnicity by study sample, H+H employee sample, and H+H workforce

Of note, the overall H+H testing sample also included American Indian (n=152), but it has been collapsed into other since it was not recorded in the study sample or overall workforce demographics. In addition, the study sample included Pacific Islander (n=5) and Multiracial (n=11) as separate categories, but they have been collapsed into Asian/Pacific Islander and Other respectively to more easily compare to the other groups.

C: Distribution of age by study sample and H+H employee sample. Age distribution data was not available for H+H workforce.

**eFigure2. Percent seropositivity by demographic characteristics of the study sample, H+H employee sample, and H+H workforce.**

A: Percent seropositivity by sex

B: Percent seropositivity by race/ethnicity

C: Percent seropositivity by race/ethnicity for Study Sample and H+H Testing Sample. Age distribution data was not available for H+H workforce.
